# Supplementary material for: Binary Binder for Cf/C-SiC Composites with Enhanced Mechanical Property
Source: MDPI journal article supplement (doi:10.3390/ma15082757), 2022-04-08
Supplement: s1 [file s1]

# Binary Binder for Cf/C-SiC Composites with Enhanced Mechanical Property

Yun Liu <sup>1</sup>, Long Ma <sup>1</sup>, Runa Dong <sup>1</sup>, Kexin Cui <sup>1</sup>, Yongzhao Hou <sup>1,2,\*</sup>, Wen Yang <sup>3</sup>, Yeqing Liu <sup>4</sup>, Cheng Zhong <sup>1</sup>, Guangwu Wen <sup>1,\*</sup> and Lijuan Zhang <sup>1</sup>

<sup>1</sup> School of Materials Science and Engineering, Shandong University of Technology, Zibo 255000, China; ly17864301063@163.com (Y.L.); ml18340071781@163.com (L.M.); drn19121102039@163.com (R.D.); ckx9221@163.com (K.C.); aa1435884413@163.com (C.Z.); zhanglj@sdut.edu.cn (L.Z.)

<sup>2</sup> Shandong Guiyuan Advanced Ceramics Co., Ltd., Zibo 255086, China

<sup>3</sup> School of Transportation and Vehicle Engineering, Shandong University of Technology, Zibo 255000, China; yangwen004@sdut.edu.cn

<sup>4</sup> Shandong Si-Nano Materials Technology Co., Ltd., Zibo 255400, China; liuyeqingyao@outlook.com

\* Correspondence: houyz1990@sdut.edu.cn (Y.H.); wengw@sdut.edu.cn (G.W.); Tel.: +86-188-1630-7735 (Y.H.)

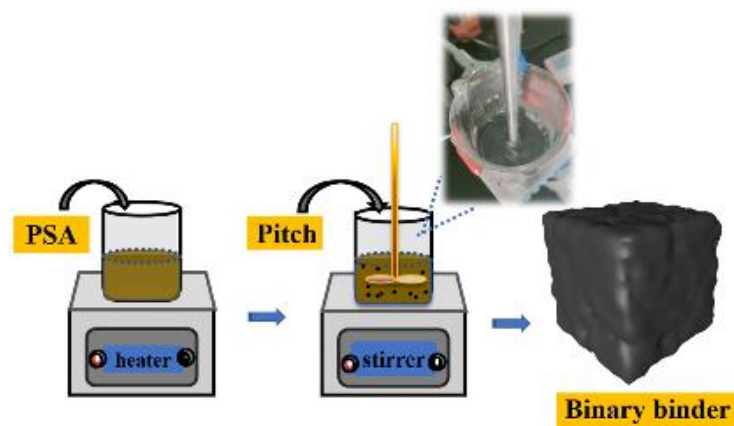

**Figure S1.** The schematic of the fabrication process of the composite binder.

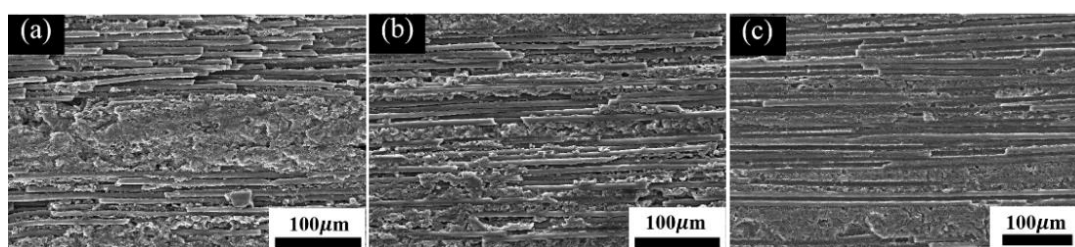

**Figure S2.** The microstructures of the polishing surface of the: (a) Cf/C-SiC-50% composite; (b) Cf/C-SiC-60% composite; (c) Cf/C-SiC-70% composite.

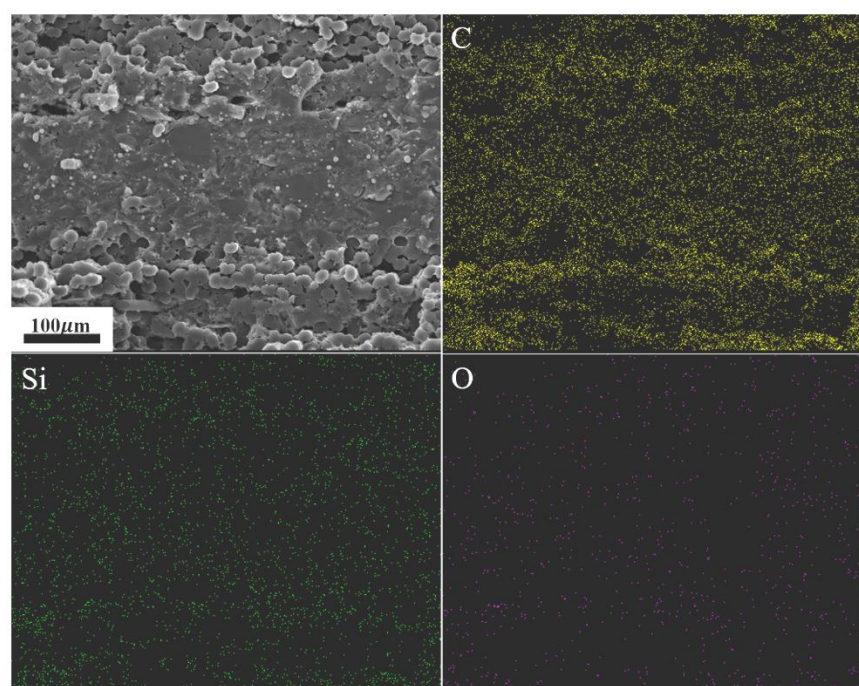

**Figure S3.** EDS analysis of Cf/C-SiC-60% composites.

**Table S1.** Map results of Cf/C-SiC-60% composite.

| Spectrum 1 |       |       | Spectrum 2 |       |       |
|------------|-------|-------|------------|-------|-------|
| element    | Wt(%) | At(%) | element    | Wt(%) | At(%) |
| Si         | 5.38  | 2.39  | Si         | 5.39  | 2.39  |
| C          | 92.13 | 95.67 | C          | 92.11 | 95.66 |
| O          | 2.5   | 1.95  | O          | 2.50  | 1.95  |
